# Supplementary material
Source: publisher figshare collection journal article supplement (https://tandf.figshare.com/ndownloader/files/15250520)
Supplement: Supplementary file 1 [file 15250520]

Table S1. Genotypes of all individuals of the three taxa of *Melastoma* at 5 nuclear genes (*cam*, *chi, gbss, tpi* and *vr*) and two chloroplast markers (*rpo*B-*trn*C and *rpo*C2). For each gene, haplotypes of *M. malabathricum* and *M. laevifolium* were coded using M and L followed by a number, and haplotypes unique to the suspected hybrids were coded using E followed by a number.

| Sample  ID | LOCUS | | | | | | |
| --- | --- | --- | --- | --- | --- | --- | --- |
| *cam* | *chi* | *gbss* | *tpi* | *vr* | *rpo*B-*trn*C | *rpo*C2 |
| SH1 | M3 L1 | M11 L2 | M10 L1 | E3 L3 | E1 L2 | M1 | M1 |
| SH2 | M12 M12 | M11 L1 | M10 M10 | M1 M6 | M7 L3 | L1 | L1 |
| SH3 | M9 L1 | M11 L1 | M12 L1 | E1 L2 | M4 L2 | L1 | L1 |
| SH4 | E4 L1 | M7 L2 | M4 L1 | M6 L1 | M5 L2 | L1 | L1 |
| SH5 | E3 L1 | M11 L2 | E4 L1 | E2 L1 | M5 L2 | L1 | L1 |
| SH6 | M3 L1 | M16 L2 | M10 L1 | M6 L3 | M4 L3 | L1 | L1 |
| SH7 | M3 L2 | M13 L2 | M9 L1 | E4 L1 | M13 L2 | L1 | L1 |
| SH8 | E1 L1 | E2 L2 | M4 L1 | M14 L2 | M3 L2 | L1 | L1 |
| SH9 | E3 L2 | M11 L2 | E2 L1 | M11 L1 | M11 L2 | L1 | L1 |
| SH11 | E1 L1 | E1 L2 | E3 L1 | E3 L3 | M1 L2 | L1 | L1 |
| SH12 | M4 L1 | M1 L1 | M13 L1 | L1 L2 | M17 L2 | L1 | L1 |
| SH13 | M9 L2 | M8 L2 | E1 L1 | M7 L2 | E2 L2 | M1 | M1 |
| SH14 | M3 L1 | M12 L2 | M10 L1 | L1 L1 | M6 L2 | L1 | L1 |
| SH15 | E2 L1 | M13 L2 | M9 L1 | E5 L2 | M7 L2 | L1 | L1 |
| SH16 | E3 L1 | L2 L2 | M10 L1 | E6 L2 | E3 L2 | M1 | M1 |
| LA1 | L2 L2 | L2 L2 | L1 L1 | L2 L3 | L2 L4 | L1 | L1 |
| LA2 | L1 L2 | L2 L2 | L1 L1 | L1 L2 | L2 L3 | L1 | L1 |
| LA3 | L2 L2 | L2 L2 | L1 L2 | L1 L2 | L2 L2 | L1 | L1 |
| LA4 | L1 L1 | L2 L2 | L1 L1 | L1 L1 | L3 L3 | L1 | L1 |
| LA5 | L1 L1 | L2 L2 | L1 L1 | L4 L4 | L2 L1 | L1 | L1 |
| LA6 | L1 L2 | L1 L1 | L1 L1 | L1 L2 | L2 L1 | L1 | L1 |
| LA7 | L1 L2 | L1 L2 | L1 L1 | L1 L3 | L2 L2 | L1 | L1 |
| LA8 | L1 L1 | L2 L2 | L1 L1 | L2 L3 | L2 L2 | L1 | L1 |
| LA10 | L1 L2 | L2 L2 | L1 L1 | L2 L3 | L2 L2 | L1 | L1 |
| LA11 | L1 L1 | L2 L2 | L1 L1 | L1 L2 | L2 L3 | L1 | L1 |
| LA12 | L1 L2 | L1 L2 | L1 L1 | L2 L2 | L2 L3 | L1 | L1 |
| LA13 | L1 L1 | L1 L3 | L1 L1 | L1 L3 | L2 L1 | L1 | L1 |
| LA15 | L1 L2 | L2 L2 | L1 L1 | L1 L3 | L2 L2 | L1 | L1 |
| LA16 | L1 L2 | L2 L2 | L1 L1 | L1 L2 | L2 L3 | L1 | L1 |
| LA17 | L1 L1 | L1 L2 | L1 L1 | L2 L2 | L3 L3 | L1 | L1 |
| LA19 | L1 L2 | L2 L2 | L1 L1 | L2 L3 | L2 L3 | L1 | L1 |
| LA20 | L2 L2 | L1 L2 | L1 L1 | L2 L2 | L2 L2 | L1 | L1 |
| LA21 | L1 L2 | L2 L2 | L1 L1 | L2 L3 | L3 L3 | L1 | L1 |
| LA22 | L1 L1 | L2 L2 | L1 L1 | L4 L4 | L2 L2 | L1 | L1 |
| LA23 | L1 L1 | L2 L2 | L1 L1 | L3 L4 | L2 L1 | L1 | L1 |
| LA24 | L1 L1 | L2 L2 | L1 L1 | L1 L3 | L1 L3 | L1 | L1 |
| MM1 | M1 M16 | M2 M6 | M10 M10 | M6 M15 | M4 M16 | M1 | M1 |
| MM2 | M6 M6 | M7 M8 | M10 M11 | M3 M12 | M4 M6 | M1 | M1 |
| MM3 | M3 M12 | M4 M12 | M10 M11 | M3 M12 | M5 M9 | M1 | M1 |
| MM4 | M8 M10 | M6 M12 | M9 M10 | M10 M15 | M7 M10 | M1 | M1 |
| MM5 | M5 M19 | M1 M7 | M10 M11 | M1 M11 | M1 M5 | M1 | M1 |
| MM6 | M3 M12 | M1 M1 | M10 M11 | M7 M11 | M4 M11 | M1 | M1 |
| MM7 | M3 M8 | M13 M15 | M2 M4 | M4 M15 | M11 M13 | M1 | M1 |
| MM8 | M7 M8 | M9 M9 | M10 M10 | M1 M12 | M2 M3 | M1 | M1 |
| MM9 | M3 M12 | M7 M16 | M10 M13 | M6 M12 | M17 M18 | M1 | M1 |
| MM10 | M12 M13 | M11 M14 | M11 M11 | M15 M15 | M1 M11 | M1 | M1 |
| MM11 | M3 M8 | M11 M13 | M6 M10 | M7 M12 | M2 M8 | M1 | M1 |
| MM12 | M8 M13 | M3 M6 | M2 M10 | M9 M12 | M13 M14 | M1 | M1 |
| MM13 | M11 M15 | M6 M6 | M11 M12 | M14 M15 | M1 M4 | M1 | M1 |
| MM14 | M4 M8 | M1 M10 | M9 M10 | M12 M12 | M4 M4 | M1 | M1 |
| MM15 | M2 M12 | M1 M6 | M6 M9 | M5 M14 | M4 M13 | M1 | M1 |
| MM16 | M3 M12 | M11 M12 | M8 M10 | M1 M2 | M4 M16 | M1 | M1 |
| MM17 | M11 M18 | M4 M13 | M10 M12 | M4 M12 | M5 M13 | M1 | M1 |
| MM18 | M12 M14 | M14 M16 | M2 M12 | M12 M15 | M5 M13 | M1 | M1 |
| MM19 | M13 M18 | M7 M11 | M7 M10 | M13 M15 | M6 M11 | M1 | M1 |
| MM20 | M7 M17 | M1 M8 | M1 M10 | M7 M12 | M8 M13 | M1 | M1 |
| MM21 | M12 M12 | M5 M11 | M10 M11 | M4 M12 | M11 M11 | M1 | M1 |
| MM22 | M8 M9 | M6 M8 | M10 M10 | M8 M15 | M5 M12 | M1 | M1 |
| MM23 | M7 M12 | M7 M12 | M11 M12 | M6 M15 | M1 M5 | M1 | M1 |
| MM24 | M6 M9 | M6 M14 | M3 M10 | M12 M15 | M5 M11 | M1 | M1 |
| MM25 | M12 M12 | M1 M8 | M5 M10 | M4 M15 | M15 M19 | M1 | M1 |

NOTE: SH: suspected hybrids; LA: *M. laevifolium*; MM: *M. malabathricum*
